# Supplementary material for: Rapid multiplex detection of 10 foodborne pathogens with an up-converting phosphor technology-based 10-channel lateral flow assay
Source: PubMed Central journal article supplement (PMC4756364; doi:10.1038/srep21342), 2016-02-17
Supplement: srep21342-s1.pdf [file srep21342-s1.pdf]

## Supplementary Information

### **Rapid multiplex detection of 10 foodborne pathogens with an up-converting phosphor technology-based 10-channel lateral flow assay**

Yong Zhao<sup>1,2,†</sup>, Haoran Wang<sup>3,1,†</sup>, Pingping Zhang<sup>1,2</sup>, Chongyun Sun<sup>1,2,4</sup>, Xiaochen Wang<sup>1,2,5</sup>,  
Xinrui Wang<sup>1,2,6</sup>, Ruifu Yang<sup>1,2</sup>, Chengbin Wang<sup>4,\*</sup>, Lei Zhou<sup>1,2,\*</sup>

<sup>1</sup>Laboratory of Analytical Microbiology, State Key Laboratory of Pathogen and Biosecurity, Beijing Institute of Microbiology and Epidemiology, Beijing 100071, P. R. China

<sup>2</sup>Beijing Key Laboratory of POCT for Bioemergency and Clinic (No. BZ0329), Beijing 100071, P. R. China

<sup>3</sup>School of Food and Nutrition, Massey University, Palmerston North 4442, New Zealand

<sup>4</sup>Department of Clinical Laboratory, Chinese People's Liberation Army General Hospital, Beijing 100853, P. R. China

<sup>5</sup>College of Animal Science and Technology, Jilin Agricultural University, Changchun 130118, P. R. China

<sup>6</sup>Institute for Plague Prevention and Control of Hebei Province, Zhangjiakou 075000, P. R. China

<sup>†</sup>YZ and HW contributed equally to this work.

\*Corresponding authors:

Lei Zhou, Tel: +86-10-66948562; E-mail: ammszhoulei@aliyun.com

Chengbin Wang, Tel: +86-10-66937391; E-mail: wangcb301@126.com

**Supplementary Table S1. Sample treatment buffers used in the single-target UPT-LF****assays and the TC-UPT-LF assay.**

| <b>Treatment buffers</b>   | <b>Buffer compositions</b> |                           |             |
|----------------------------|----------------------------|---------------------------|-------------|
| <i>E. coil</i> O157:H17    | 0.05 M Tris-HCl (pH 8.0)   | 2.5% defatted milk powder | 0.25 M NaCl |
| <i>S. paratyphi</i> A      | 0.05 M Tris-HCl (pH 8.0)   | 2.5% defatted milk powder | 0.25% SDS   |
| <i>S. paratyphi</i> B      | 0.05 M Tris-HCl (pH 8.0)   | 2.5% defatted milk powder | 0.25% SDS   |
| <i>S. paratyphi</i> C      | 0.05 M Tris-HCl (pH 8.0)   | 2.5% defatted milk powder | 0.25% SDS   |
| <i>S. enteritidis</i>      | 0.05 M Tris-HCl (pH 8.0)   | 2.5% defatted milk powder | 0.1% SDS    |
| <i>S. typhi</i>            | 0.05 M Tris-HCl (pH 8.0)   | 2.5% defatted milk powder | 0.5 M NaCl  |
| <i>S. choleraesuis</i>     | 0.05 M Tris-HCl (pH 8.0)   | 2.5% defatted milk powder | 0.25 M NaCl |
| <i>V. cholera</i> O1       | 0.05 M Tris-HCl (pH 8.0)   | 3.5% defatted milk powder | 0.5 M NaCl  |
| <i>V. cholera</i> O139     | 0.05 M Tris-HCl (pH 8.0)   | 3.5% defatted milk powder | 0.5 M NaCl  |
| <i>V. parahaemolyticus</i> | 0.05 M Tris-HCl (pH 8.0)   | 2.5% defatted milk powder | 0.1 % SDS   |
| The universal buffer       | 0.05 M Tris-HCl (pH 8.0)   | 2.5% defatted milk powder | 0.25% SDS   |
